# Supplementary material
Source: Elsevier journal article supplement (https://www.sciencedirect.com/science/article/pii/S0213911112002555)
Supplement: mmc1 [file S0213911112002555:mmc1.docx]

**Tabla I**

Grupos de motivos de cesárea y códigos CIE-9-MC

| Grupos | Descripción | Códigos CIE-9-MC |
| --- | --- | --- |
| Presentación anómala | Presentación anómala o prolapso del cordón | 652.8X; 652.2X; 652.3X; 652.4X; 663.0X, 652.0X; 652.6X; 652.7X; 652.8X; 652.9X |
| Alteraciones del crecimiento intrauterino o del sistema nervioso central | Macrosomía/retraso en el crecimiento intrauterino/malformación del sistema nervioso central | 655.0X; 656.6X; 656.5X |
| Sufrimiento fetal agudo | Sufrimiento fetal agudo/meconio/anormalidad del latido cardiaco | 656.3X; 659.7X; 656.8X |
| Rotura prematura de membranas | Rotura prematura de membranas | 658.1X |
| Prematuridad | Inicio prematuro del parto | 644.2X |
| Hemorragia anteparto | Hemorragias uterinas anteparto/placenta previa/ *abruptio placentae* | 641.0X-641.9X |
| Distocia y desproporción | Distocias maternas o desproporciones fetales | 661.4X; 653.0X; 653.1X; 653.3X; 654.0X; 654.1X;654.3X; 654.4X; 654.6X; 654.7X; 654.8X; 653.4X; 653.5X; 653.7X; 653.8X; 653.9X |
| Desarrollo del parto | Obstrucción y fracaso del inicio del parto/parto prolongado/rotura de útero | 662.0X; 662.1X; 662.2X; 662.3X; 659.1X; 660.0X a 660.9X; 665.0X; 665.1X |
| Alteraciones maternas | Alteraciones maternas como hipertensión, diabetes, enfermedad cardiaca, enfermedad renal, enfermedad pulmonar y enfermedades virales | 654.9X ; 642.0X- 642.7X; 647.6X +042 o +054.10 o +054.11 o +054.12 o +054.19; 648.8X; 648.0X; 642.9X; 250-250.9; 401-405.9; 393-398.99; 410-414.99; 420-429.99; 648.5-648.63; 580-586.99; 646.2-646.29; 592-592.99; 480-519.99 |
| Alteraciones de la cavidad amniótica e isoinmunizaciones | Oligohidramnios, polihidramnios, infecciones de la cavidad amniótica e isoinmunización | 658.0X; 658.4X; 656.1X; 656.2X |
